# Supplementary material
Source: PubMed Central journal article supplement (PMC4702221)
Supplement: CJN.02110215_CJN02110215SupplementaryData.pdf [file CJN.02110215_CJN02110215SupplementaryData.pdf]

## Supplementary Table 1

Accuracy and speed z-scores [median (interquartile range)] in each CNB subtest for participants with chronic kidney disease (CKD) (n=92). Age-specific z-scores are based on norms from the Philadelphia Neurodevelopmental Cohort (PNC, n=1790). Wilcoxon signed rank tests were performed to determine if observed z-scores for CKD participants for each subtest were significantly different from the expected z-scores of 0 based on the PNC reference population; Wilcoxon 95% confidence intervals and *P* values are as shown.

| Neuro-behavioral function | Domain                         | Test Name                                | Accuracy z-scores for CKD participants, median (IQR) | Wilcoxon 95% CI | <i>P</i> value for difference from expected z-score of 0 | Speed z-scores for CKD participants, median (IQR) | Wilcoxon 95% CI | <i>P</i> value for difference from expected z-score of 0 |
|---------------------------|--------------------------------|------------------------------------------|------------------------------------------------------|-----------------|----------------------------------------------------------|---------------------------------------------------|-----------------|----------------------------------------------------------|
| Executive control         | Abstraction/mental flexibility | Penn Conditional Exclusion Test (PCET)   | -0.24 (-1.23, 0.49)                                  | -0.48, -0.04    | 0.03                                                     | -0.11 (-0.83, 0.44)                               | -0.39, 0.03     | 0.10                                                     |
|                           | Attention                      | Penn Continuous Performance Test (PCPT)  | 0.07 (-0.72, 0.51)                                   | -0.35, 0.10     | 0.34                                                     | -0.33 (-1.02, 0.20)                               | -0.65, -0.20    | <0.001                                                   |
|                           | Working memory                 | Short Letter N-Back Test (SLNB)          | -0.04 (-1.06, 0.28)                                  | -0.52, -0.09    | 0.01                                                     | 0.28 (-0.49, 0.68)                                | -0.13, 0.32     | 0.36                                                     |
| Episodic memory           | Verbal memory                  | Penn Word Memory (CPW)                   | -0.21 (-1.07, 0.35)                                  | -0.62, -0.04    | 0.006                                                    | -0.05 (-0.84, 0.44)                               | -0.42, 0.02     | 0.08                                                     |
|                           | Facial memory                  | Penn Face Memory (CPF)                   | -0.40 (-1.17, 0.39)                                  | -0.64, -0.13    | 0.004                                                    | 0.16 (-0.34, 0.64)                                | -0.08, 0.28     | 0.22                                                     |
|                           | Spatial memory                 | Visual Object Learning Test (VOLT)       | -0.30 (-0.92, 0.43)                                  | -0.53, -0.05    | 0.02                                                     | 0.16 (-0.47, 0.67)                                | -0.10, 0.29     | 0.28                                                     |
| Complex cognition         | Verbal reasoning               | Penn Verbal Reasoning Test (PVRT)        | -0.49 (-1.41, 0.06)                                  | -0.83, -0.37    | <0.001                                                   | -0.16 (-0.78, 0.47)                               | -0.39, 0.02     | 0.07                                                     |
|                           | Nonverbal reasoning            | Penn Matrix Reasoning Test (PMAT)        | -0.54 (-1.12, 0.15)                                  | -0.69, -0.28    | <0.001                                                   | 0.47 (0.03, 0.78)                                 | 0.18, 0.50      | <0.001                                                   |
|                           | Spatial processing             | Penn Line Orientation Test (PLOT)        | -0.45 (-1.04, 0.35)                                  | -0.60, -0.16    | 0.001                                                    | 0.00 (-0.61, 0.62)                                | -0.30, 0.18     | 0.74                                                     |
| Social cognition          | Emotion identification         | Penn Emotion Identification Test (ER40)  | -0.17 (-1.20, 0.75)                                  | -0.52, 0.02     | 0.08                                                     | -0.17 (-0.76, 0.28)                               | -0.42, -0.06    | 0.009                                                    |
|                           | Emotion differentiation        | Penn Emotion Differentiation Test (MEDF) | 0.09 (-1.01, 0.72)                                   | -0.38, 0.14     | 0.36                                                     | -0.01 (-0.52, 0.63)                               | -0.18, 0.18     | 0.92                                                     |
|                           | Age differentiation            | Penn Age Differentiation Test (ADT)      | -0.34 (-1.08, 0.36)                                  | -0.59, -0.13    | 0.005                                                    | 0.24 (-0.28, 0.55)                                | 0.00, 0.31      | 0.05                                                     |
